# Supplementary material for: Charcot-Marie-Tooth disease type 2CC due to NEFH variants causes a progressive, non-length-dependent, motor-predominant phenotype
Source: PubMed Central journal article supplement (PMC8685631; doi:10.1136/jnnp-2021-327186), 2021-09-13
Supplement: jnnp-2021-327186supp001.pdf [file jnnp-2021-327186supp001.pdf]

## Charcot-Marie-Tooth disease type 2CC due to NEFH variants causes a progressive, non-length dependent, motor predominant phenotype

**Supplementary table. A) Detailed clinical features from 28 phenotyped family members.** Motor scores are according to the Medical Research Council (MRC) scale of muscle strength. In the column of 'LL distal muscle weakness' the two numbers, where available, represent the strength of ankle dorsiflexion and ankle plantarflexion, separated by a comma, respectively. The superscript <sup>a</sup> in either the symptomatology or examination indicates early ankle plantarflexion involvement and/or ankle plantarflexion weakness  $\geq$  ankle dorsiflexion weakness. Abbreviations: AOO, age of onset; CMTESv2, Charcot-Marie-Tooth Examination Score v2.0; IVIG, intravenous immunoglobulins; LL, lower limbs; NA, not available; n/a, not applicable; OSA, obstructive sleep apnoea; UL, upper limbs; UMN, upper motor neuron.

| Family - Patient | Sex | AOO (yrs) | Presenting symptoms                  | Proximal features / age of occurrence                | Sensory sympt.        | Age at assessment | Mobility         | Muscle weakness |           |         |                     | UMN features                    | CMTES v2 | Additional features       |
|------------------|-----|-----------|--------------------------------------|------------------------------------------------------|-----------------------|-------------------|------------------|-----------------|-----------|---------|---------------------|---------------------------------|----------|---------------------------|
|                  |     |           |                                      |                                                      |                       |                   |                  | UL prox         | UL distal | LL prox | LL distal           |                                 |          |                           |
| UK1 – IV.1       | M   | 4         | Frequent falls; turning on ankles    | Unable to stand from sitting without using arms / 21 | No                    | 31                | Wheel-chair      | 5               | 4+        | 4       | 3, 1 <sup>a</sup>   | Spastic gait in early adulthood | 18       | Pes cavus, clawed toes    |
| UK1 – III.2      | M   | 45        | Tripping; unable to run              | No                                                   | No                    | 63                | Wheel-chair      | 5               | 4         | 5       | 4, 4- <sup>a</sup>  | Extensor plantars               | 14       | No                        |
| UK1 – II.1       | F   | 20s       | Unable to stand on toes <sup>a</sup> | No                                                   | Numbness (mid calves) | 78                | Wheel-chair      | 5               | 3-4       | 4       | 1                   | No                              | 20 (v1)  | No                        |
| UK2 – IV.2       | F   | 14        | Falls                                | Difficulty going upstairs / 18                       | No                    | 19                | Indepen. walking | 5               | 5         | 5       | 4+, 5               | No                              | 5        | Achilles tendon tightness |
| UK2 – III.3      | F   | NA        | NA                                   | NA                                                   | NA                    | 43                | Indepen. walking | 5               | 4         | 4       | 4                   | No                              | NA       | No                        |
| UK3 – III.2      | M   | 40        | Legs giving way                      | Difficulty standing from low chair / 44              | No                    | 44                | Indepen. walking | 4               | 4         | 5       | 4+, 4+ <sup>a</sup> | No                              | NA       | High arches, clawed toes  |

## Supplementary table. A) (continued).

| Family - Patient | Sex | AOO (yrs) | Presenting symptoms                      | Proximal features / age of occurrence | Sensory sympt.         | Age at assessment | Mobility         | Muscle weakness |           |         |                    | UMN features | CMTES v2 | Additional features     |
|------------------|-----|-----------|------------------------------------------|---------------------------------------|------------------------|-------------------|------------------|-----------------|-----------|---------|--------------------|--------------|----------|-------------------------|
|                  |     |           |                                          |                                       |                        |                   |                  | UL prox         | UL distal | LL prox | LL distal          |              |          |                         |
| UK4 – IV.7       | F   | 35        | Difficulty going upstairs                | From the onset                        | No                     | 53                | Mobility scooter | 5               | 5         | 2       | 4+,4+ <sup>a</sup> | No           | 8        | OSA (CPAP)              |
| UK4 – III.1      | M   | 37        | Walking and running difficulties; falls  | Difficulty going upstairs / 50        | No                     | 75                | Mobility scooter | 4-5             | 3-4       | 3       | 0, 0               | No           | NA       | High arches             |
| UK4 – III.4      | M   | 40        | Difficulty going upstairs; unable to run | From the onset                        | Numbness (distal calf) | 77                | Wheel-chair      | 3               | 1-4       | 0       | 0, 0               | No           | NA       | No                      |
| UK4 – III.5      | F   | 35        | Difficulty on stairs and going uphill    | From the onset                        | No                     | 73                | Wheel-chair      | 4               | 4-5       | 0       | 3, 3 <sup>a</sup>  | No           | NA       | No                      |
| UK4 – IV.2       | M   | 12        | Difficulty running                       | NA                                    | Numbness (ankles)      | 53                | Mobility scooter | 4               | 4-5       | 0-3     | 3, 3 <sup>a</sup>  | No           | NA       | No                      |
| UK4 – IV.4       | F   | 13        | Legs giving way                          | Difficulty going upstairs / 20        | No                     | 48                | Mobility scooter | 3-4             | 4+        | 1-3     | 4-, 3 <sup>a</sup> | No           | NA       | No                      |
| UK4 – IV.8       | M   | 45        | Legs giving way; unable to run           | Difficulty going upstairs / 48        | No                     | 50                | Indepen. walking | 5               | 5         | 5       | 4+, 5-             | No           | NA       | Jaw cramps when yawning |

Supplementary table. A) (continued).

| Family - Patient | Sex | AOO (yrs) | Presenting symptoms                             | Proximal features / age of occurrence  | Sensory sympt. | Age at assessment | Mobility         | Muscle weakness |           |         |           | UMN features      | CMTES v2 | Additional features                 |
|------------------|-----|-----------|-------------------------------------------------|----------------------------------------|----------------|-------------------|------------------|-----------------|-----------|---------|-----------|-------------------|----------|-------------------------------------|
|                  |     |           |                                                 |                                        |                |                   |                  | UL prox         | UL distal | LL prox | LL distal |                   |          |                                     |
| FR1 – III.3      | F   | 27        | Difficulty going upstairs                       | From the onset                         | No             | 51                | Wheel-chair      | 5               | 3         | 2       | 1         | No                | 24       | Pes cavus; hypophonia               |
| FR1 – II.1       | F   | 35        | Difficulty rising from floor and walking uphill | From the onset                         | No             | 70                | Bed-bound        | 3               | 3         | 0-1     | 0         | Brisk ankle jerks | NA       | Pes cavus; Onset after pregnancy    |
| FR1 – II.5       | M   | 38        | Walking difficulties                            | Difficulty going upstairs / 45         | No             | 68                | Indepen. walking | 5               | 4         | 4       | 3         | No                | 20       | Pes cavus                           |
| FR1 – III.2      | F   | 30        | Frequent falls; unable to run                   | No                                     | No             | 55                | Indepen. walking | 5               | 5         | 4       | 3         | No                | 12       | Pes cavus; worse after pregnancy    |
| FR1 – III.4      | M   | 30        | Walking difficulties; falls                     | Difficulty standing up from chair / 46 | No             | 50                | Indepen. walking | 5               | 3         | 4       | 3         | No                | 20       | Susceptible to malignant hypertherm |
| FR1 – III.5      | M   | 43        | Difficulty going upstairs                       | From the onset                         | No             | 49                | Stick            | 5               | 4         | 4       | 3         | No                | 17       | Pes cavus                           |
| FR1 – III.6      | F   | 40        | Walking difficulties; falls                     | Difficulty going upstairs / 43         | No             | 46                | Indepen. walking | 5               | 5         | 3       | 4         | No                | 9        | Pes cavus                           |
| FR1 – III.7      | F   | 34        | Unable to run                                   | No                                     | No             | 44                | Stick            | 5               | 5         | 3       | 0-1       | Spread knee jerks | NA       | Pes cavus; onset after pregnancy    |
| FR1 – IV.1       | M   | 15        | Difficult to run                                | No                                     | No             | 23                | Indepen. walking | 5               | 5         | 5       | 4         | Brisk jerks       | 12       | Pes cavus                           |
| FR1 – IV.5       | F   | NA        | Asymptomatic at 23yrs                           | NA                                     | No             | 23                | Indepen. walking | 5               | 5         | 5       | 5         | No                | n/a      | No                                  |
| FR1 – IV.6       | M   | NA        | Asymptomatic at 17yrs                           | NA                                     | No             | 17                | Indepen. walking | 5               | 5         | 5       | 5         | No                | n/a      | No                                  |

## Supplementary table. A) (continued).

| Family - Patient | Sex | AOO | Presenting symptoms                        | Proximal features / age of occurrence | Sensory symptoms | Age at assessment | Mobility                              | Muscle weakness |           |         |                   | UMN features | CMTES v2 | Additional features                                                               |
|------------------|-----|-----|--------------------------------------------|---------------------------------------|------------------|-------------------|---------------------------------------|-----------------|-----------|---------|-------------------|--------------|----------|-----------------------------------------------------------------------------------|
|                  |     |     |                                            |                                       |                  |                   |                                       | UL prox         | UL distal | LL prox | LL distal         |              |          |                                                                                   |
| FR2 – II.1       | M   | 5   | Difficulties in walking and jumping; falls | Difficulty going upstairs / 14        | No               | 26                | Stick; wheel-chair for long distance  | 3-4             | 4         | 3-4     | 2, 1 <sup>a</sup> | No           | 24       | Pes cavus; scapular winging                                                       |
| FR3 – II.3       | M   | 11  | Difficulties in running and jumping        | Difficulty going upstairs / 13        | No               | 24                | Walker; wheel-chair for long distance | 4               | 4         | 0-1     | 0-1               | No           | 25       | Pes cavus; IVIG trial age 21 and 24 due to drastic worsening in proximal strength |
| CN1 – II.2       | F   | 12  | Difficulty standing on toes <sup>a</sup>   | Difficulty going upstairs / 18        | No               | 28                | Stick                                 | 5               | 4+        | 3       | 4+                | No           | NA       | Pes cavus; CK, 434 (nr: 32-135)                                                   |
| CN1 – III.1      | F   | NA  | Asymptomatic at 6yrs                       | No                                    | No               | 6                 | Indepen. walking                      | 5               | 5         | 5       | 5                 | No           | NA       | No                                                                                |

**Supplementary table. B) Clinical information collected by proxy on additional 5 family members.** These individuals have not been assessed or genotyped but their presentation and progression suggests a likely affected status. Abbreviations: AOO, age of onset; NA, not available.

| Family – Patient | Sex | AOO | Presenting symptoms                                | Progression                    | Mobility (age)       |
|------------------|-----|-----|----------------------------------------------------|--------------------------------|----------------------|
| UK1 – I.1        | M   | NA  | NA                                                 | Walking stick from 50s onwards | Wheelchair (70s)     |
| UK4 – II.2       | M   | 50  | Walking difficulties                               | NA                             | NA                   |
| UK4 – II.4       | M   | 52  | Difficulty going upstairs                          | NA                             | Wheelchair (mid-70s) |
| UK4 – III.3      | F   | 58  | Unable to go upstairs                              | NA                             | Wheelchair (70)      |
| UK4 – IV.5       | M   | 45  | Walking difficulties and difficulty going upstairs | NA                             | Walking trolley (56) |
